# Supplementary material for: The effects of the core material (M = Co, Ni) and catalyst support (N = MWCNTs and rGO) on the performance of M@Pd/N core–shell electrocatalysts for formate oxidation and direct formate-hydrogen peroxide fuel cells
Source: Royal Society of Chemistry journal article supplement (doi:10.1039/d3nj03710j), 2023-11-29
Supplement: d3nj03710j1.pdf [file d3nj03710j1.pdf]

## Supporting Information

**The effect of core material (M= Co, Ni) and catalyst support (N= MWCNTs and rGO) on the performance of M@Pd/N core-shell electrocatalysts for formate oxidation and direct formate-hydrogen peroxide fuel cell**

Raana Mahmoodi <sup>a</sup>, Mir Ghasem Hosseini\*<sup>a, b, c</sup>, Saeid Abrari <sup>a</sup> and Richard J. Nichols <sup>d</sup>

a) Department of Physical Chemistry, Electrochemistry Research Laboratory, University of Tabriz, Tabriz, Iran

b) c) Engineering Faculty, Department of Materials Science and Nanotechnology, Near East University, 99138 Nicosia, North Cyprus, Mersin 10, Turkey.

c) d) Electrochemistry Research Center of Production and Storages Energy, University of Tabriz, Tabriz, Iran

d) Department of Chemistry, Donnan and Robert Robinson Laboratories, University of Liverpool, Liverpool L69 7ZD, United Kingdom

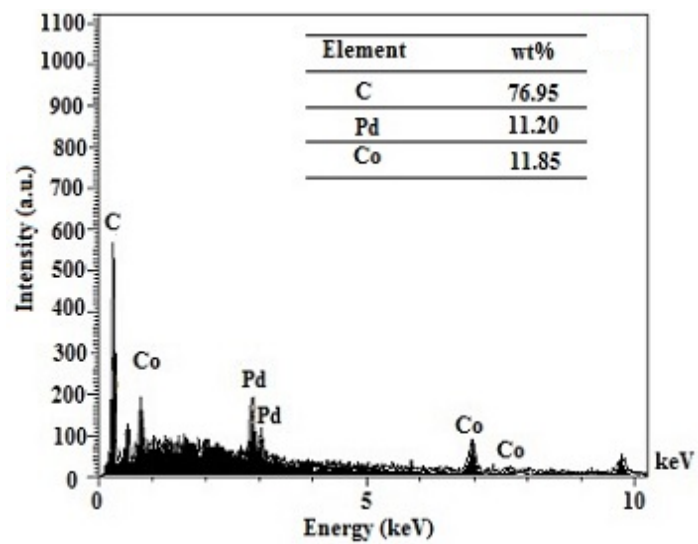

Figure S1. The EDX spectrum of Co@Pd/MWCNTs electrocatalyst.

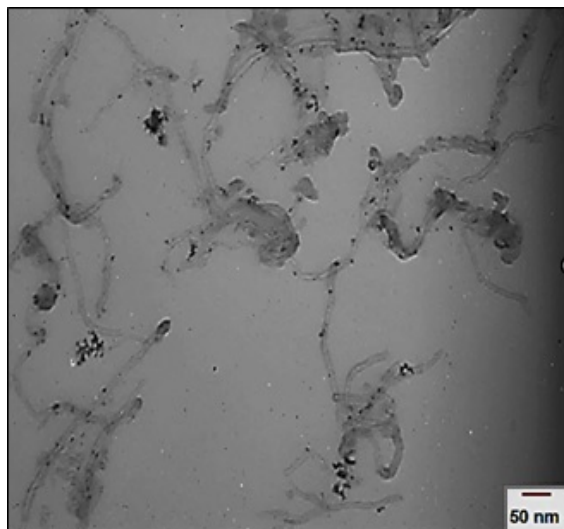

**Figure S2. TEM image of carbon nanotubes containing Co@Pd nanoparticles.**

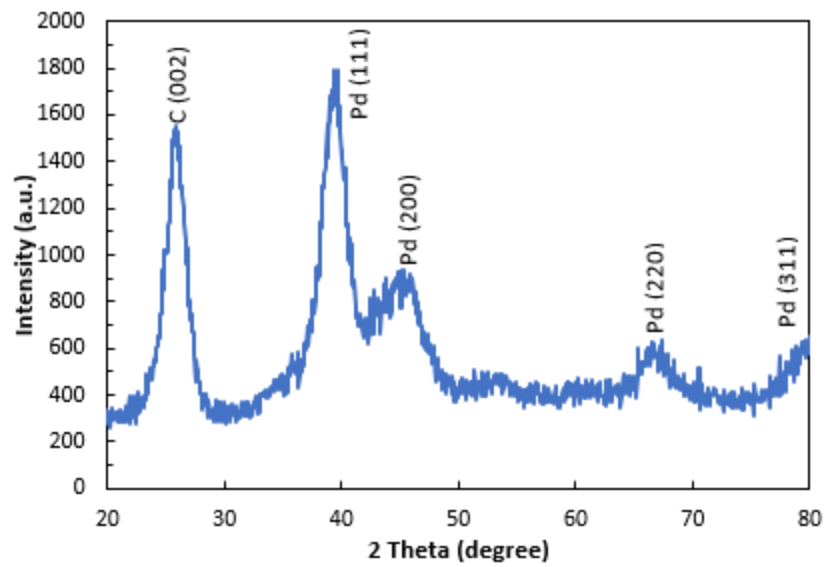

**Figure S3. XRD pattern of Co@Pd/MWCNTs electrocatalyst.**

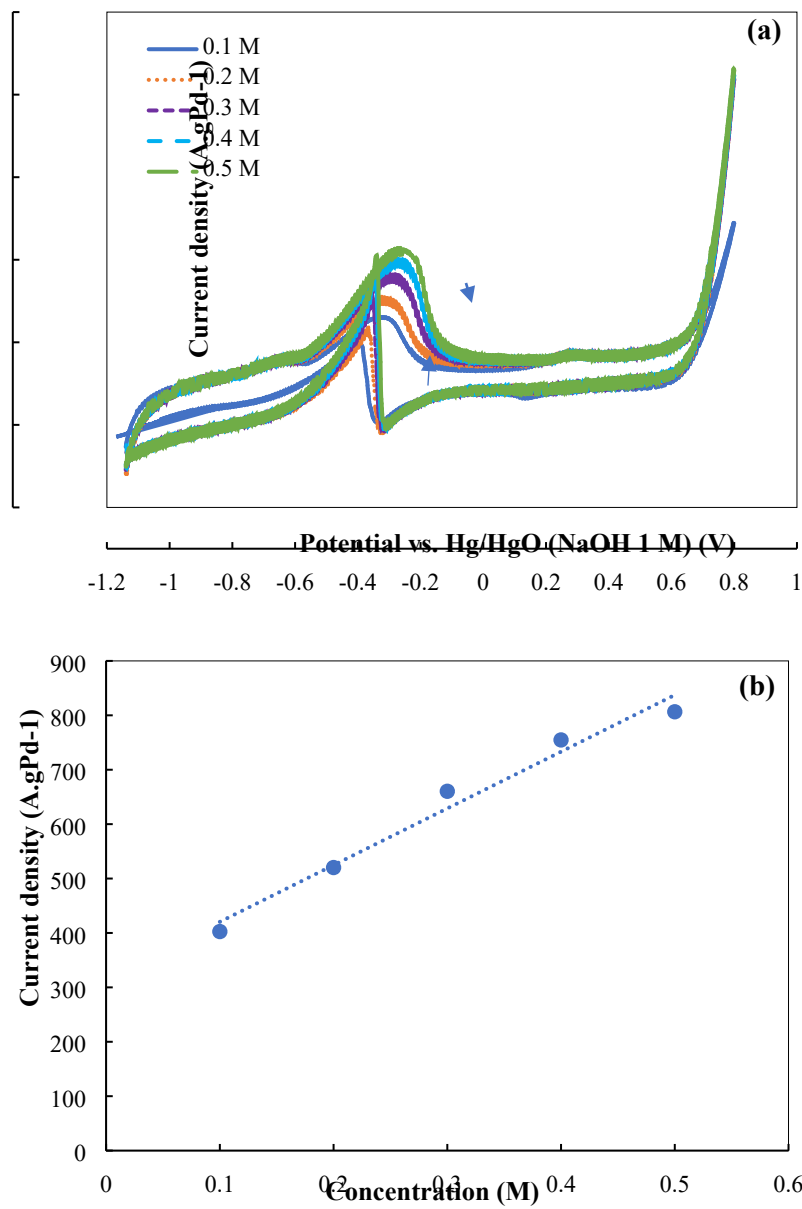

Figure S4. (a) The effect of sodium formate concentration (0.1, 0.2, 0.3, 0.4, 0.5 M) on CVs, (b) the plot of  $I_p$  against  $C_{\text{HCOONa}}$  for a Co@Pd/MWCNTs electrocatalyst.

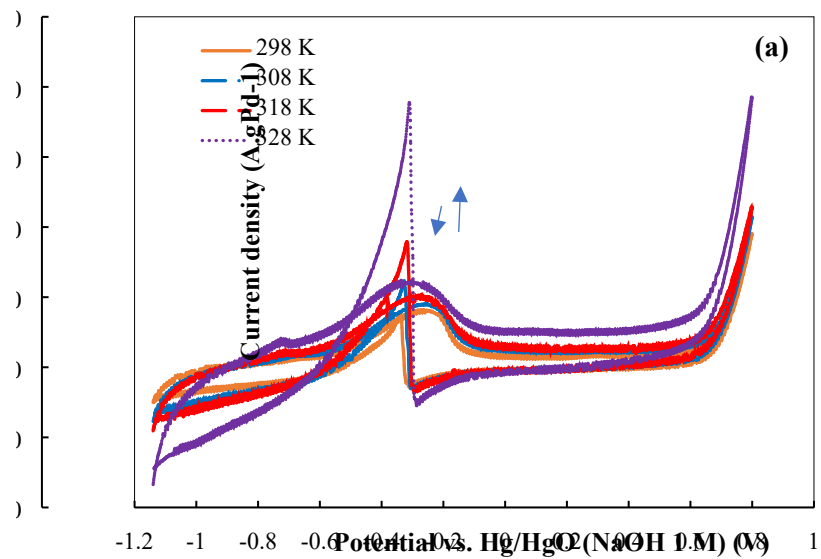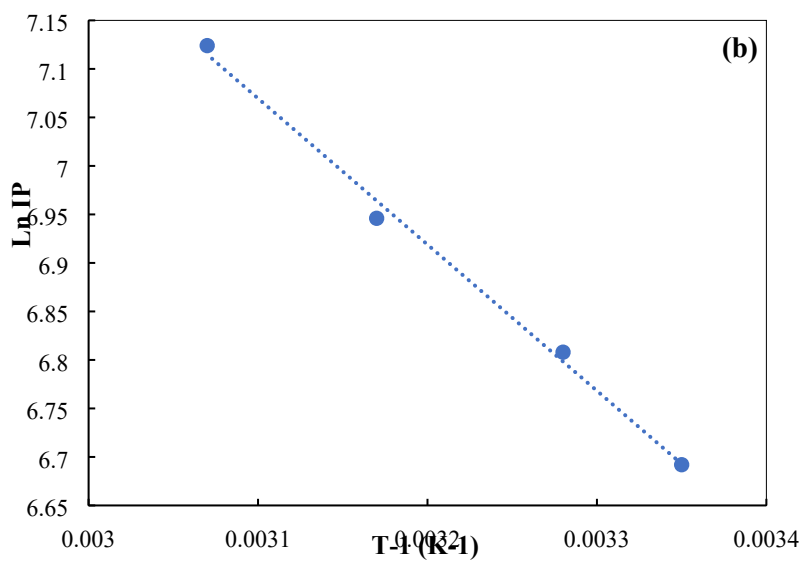

Figure S5. (a) The effect of different temperatures (298, 308, 318 and 328 K) on CVs in a solution of 1 M NaOH + 0.5 M formate, (b) The plot of  $\ln I_p$  with respect to  $T^{-1}$  for Co@Pd/MWCNTs.

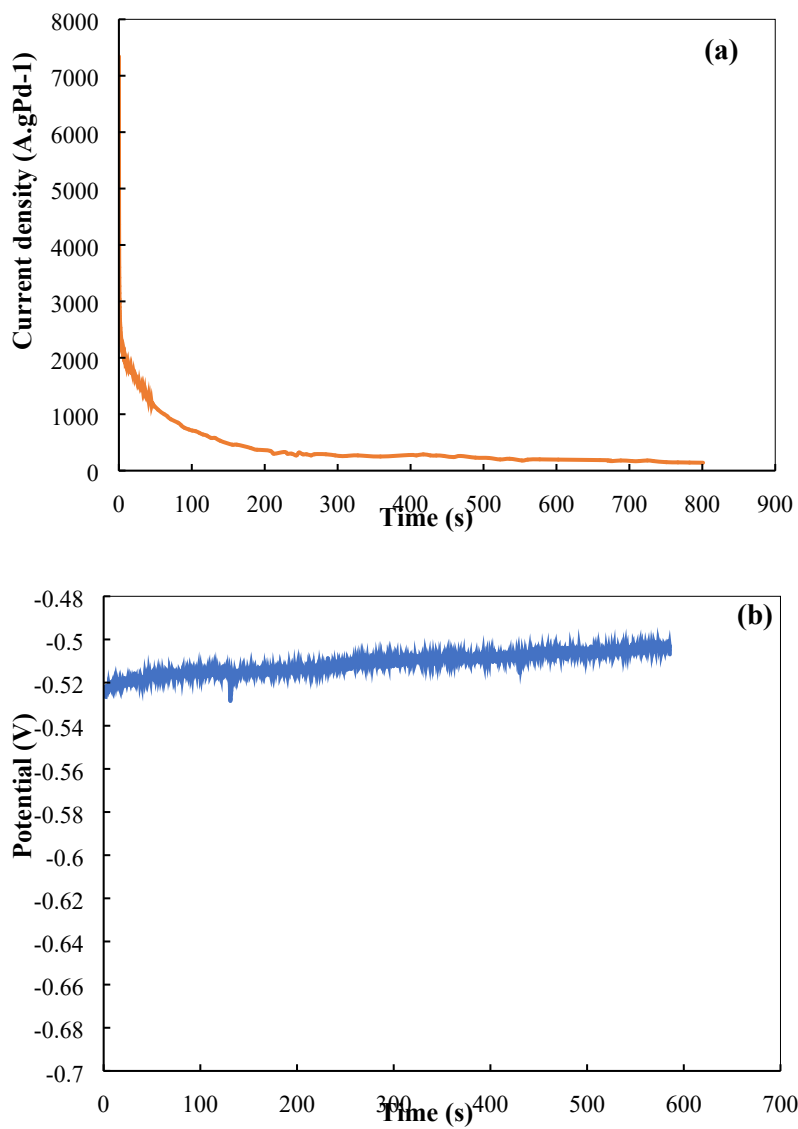

**Figure S6. (a) Chronoamperometry under constant potential (-0.37 V) and (b) chronopotentiometry under constant current (0.05 mA) for Co@Pd/MWCNTs in an alkaline solution of 0.5 M HCOONa.**

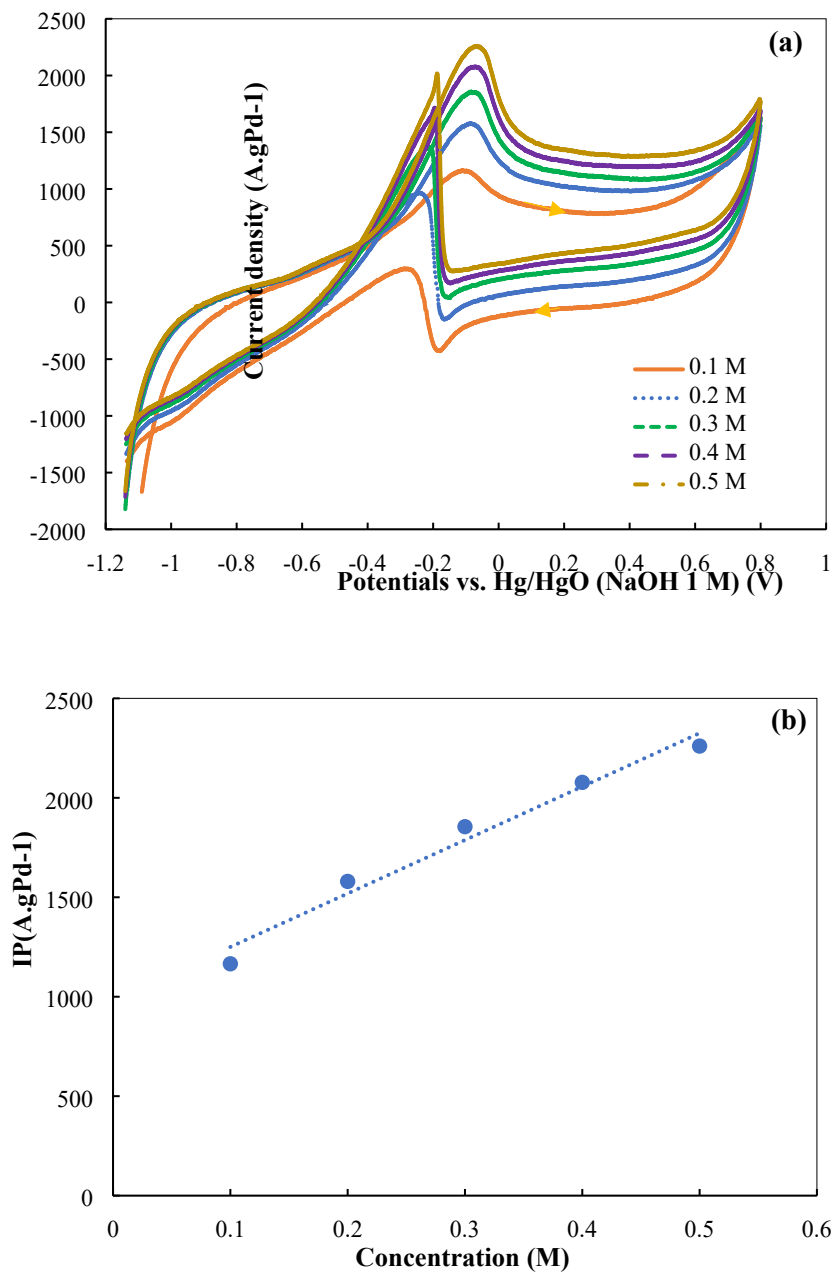

Figure S7. (a) The effect of sodium formate concentration (0.1, 0.2, 0.3, 0.4 and 0.5 M) on CVs, (b) plot of  $I_p$ - $C_{\text{HCOONa}}$  for a Ni@Pd/rGO electrocatalyst.



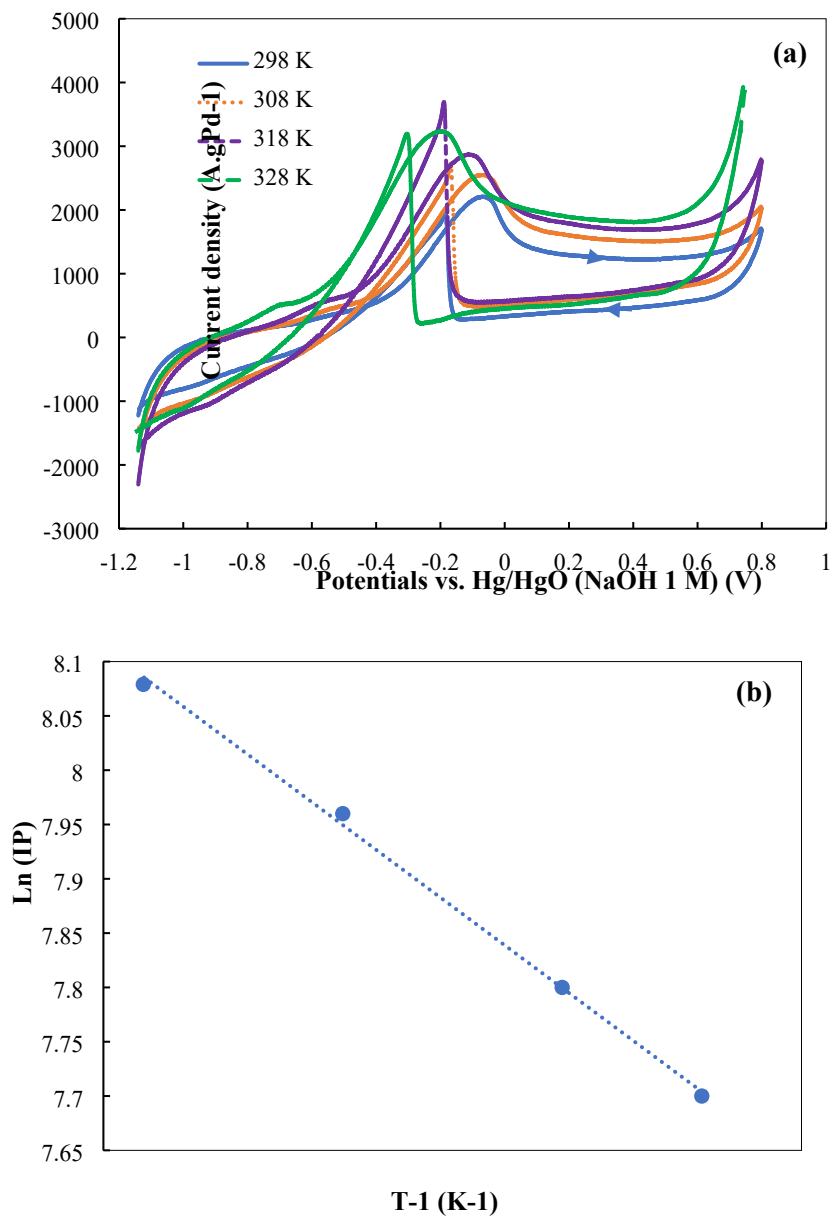

**Figure S8. (a) The effect of different temperatures (298, 308, 318 and 328 K) on CVs of sodium formate oxidation in NaOH 1 M + 0.5 M HCOONa, (b) plot of  $\ln I_p$  with respect to  $T^{-1}$  for the Ni@Pd/rGO electrocatalyst.**

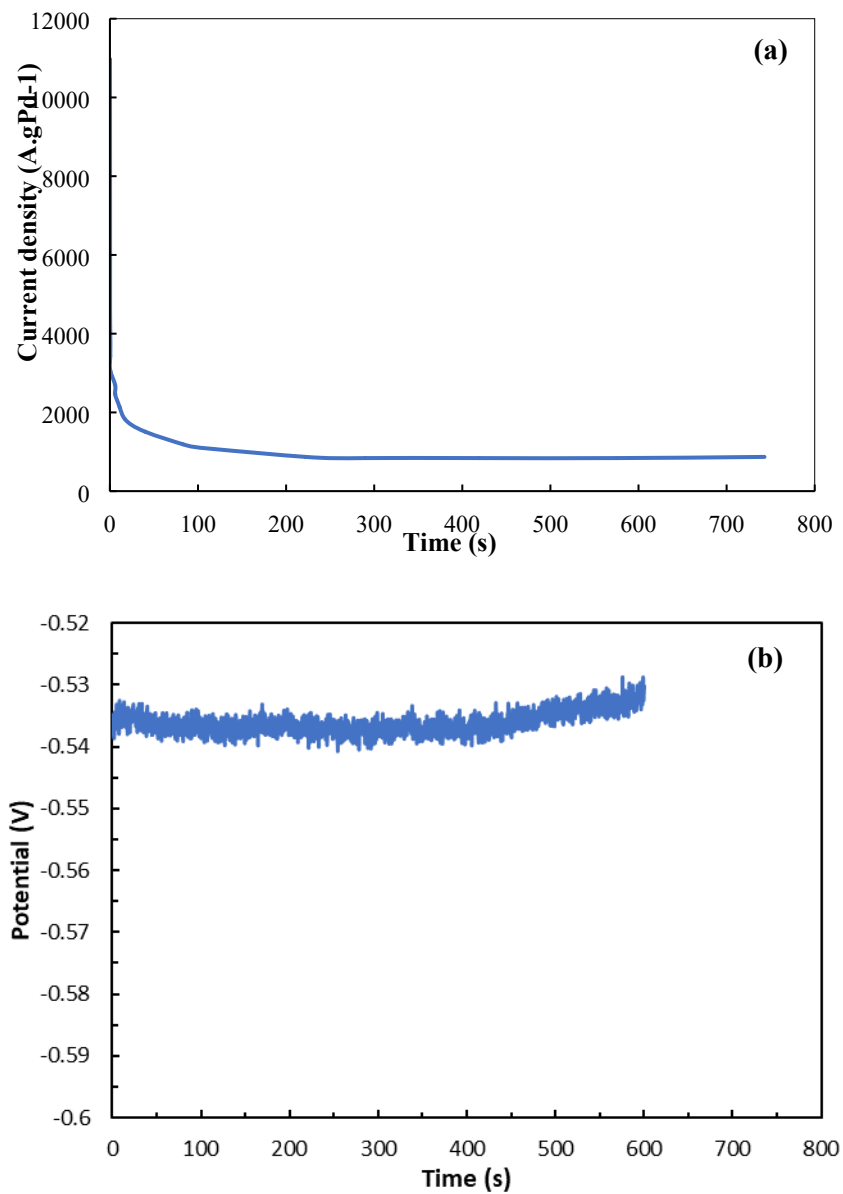

**Figure S9. (a) A chronoamperometry curve at -0.37 V, (b) a chronopotentiometry curve at 0.05 mA for the Ni@Pd/rGO catalyst in a solution of 1 M NaOH + 0.5 M sodium formate.**

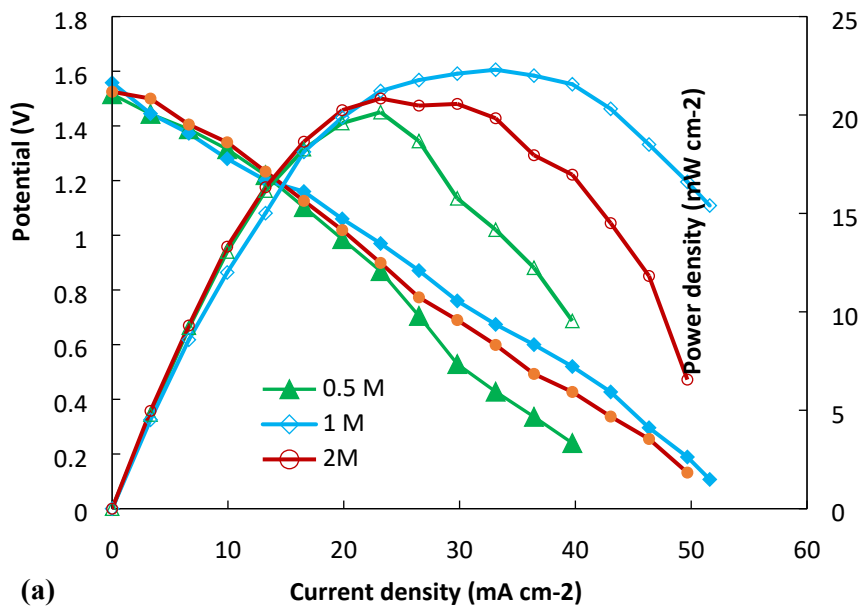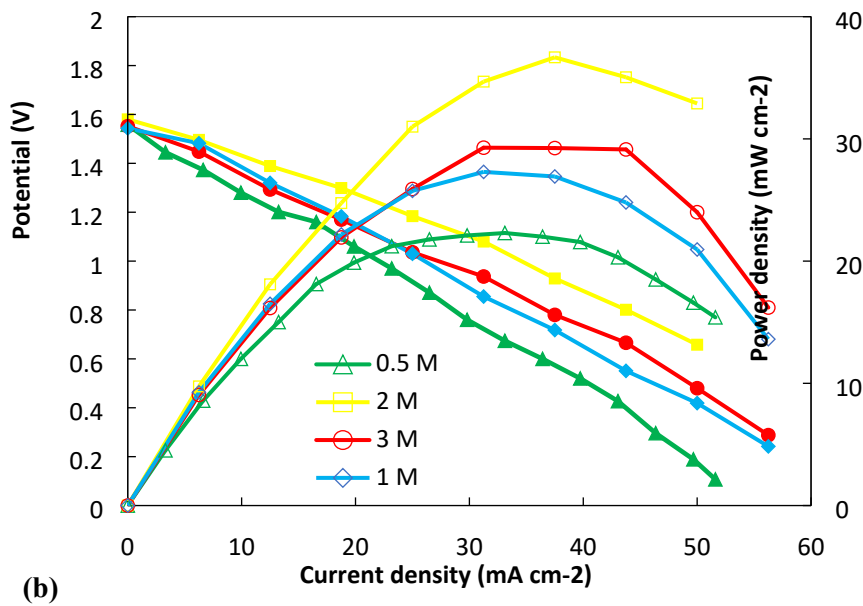

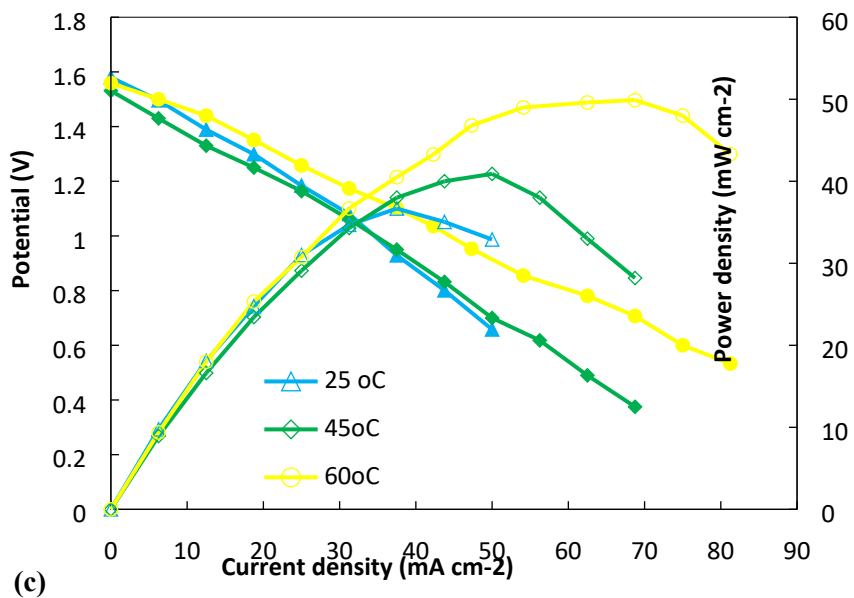

**Figure S10.** The effect of different concentrations of (a) sodium formate (0.5, 1 and 2 M), (b) hydrogen peroxide (0.5, 1, 2 and 3 M) and (c) different temperatures on  $I$ - $V$  and  $I$ - $P$  curves of the fuel cell with Co@Pd/MWCNTs as the anodic catalyst.

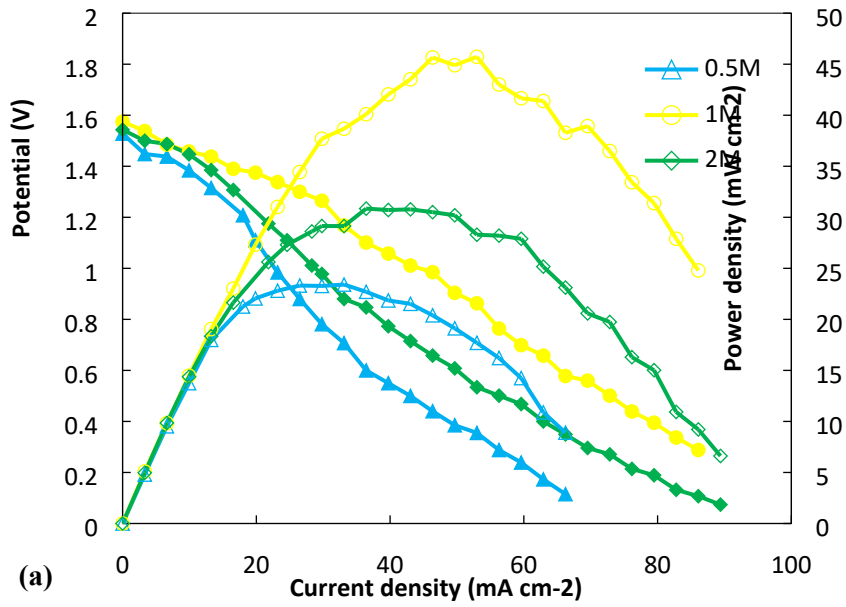

(a)

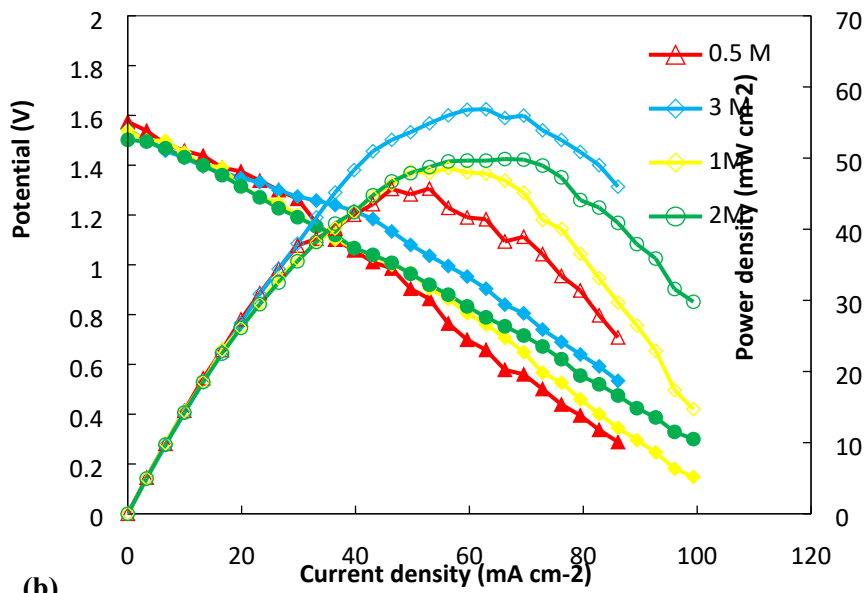

(b)

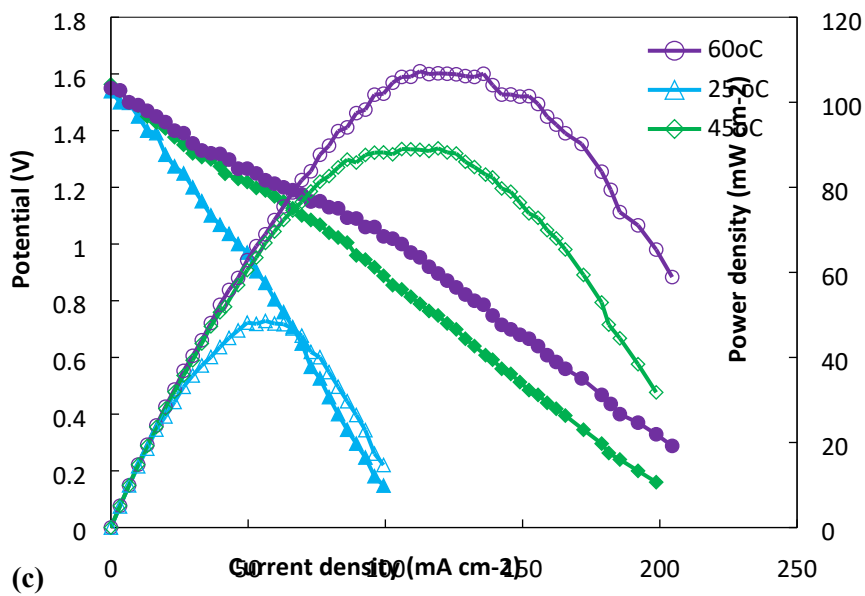

Figure S11. The effect of different concentrations of (a) sodium formate (0.5, 1 and 2 M), (b) hydrogen peroxide (0.5, 1, 2 and 3 M) and (c) different temperatures on  $I$ - $V$  and  $I$ - $P$  curves of the fuel cell with Ni@Pd/rGO as the anodic catalyst.
